# Supplementary material
Source: PubMed Central journal article supplement (PMC3526091)

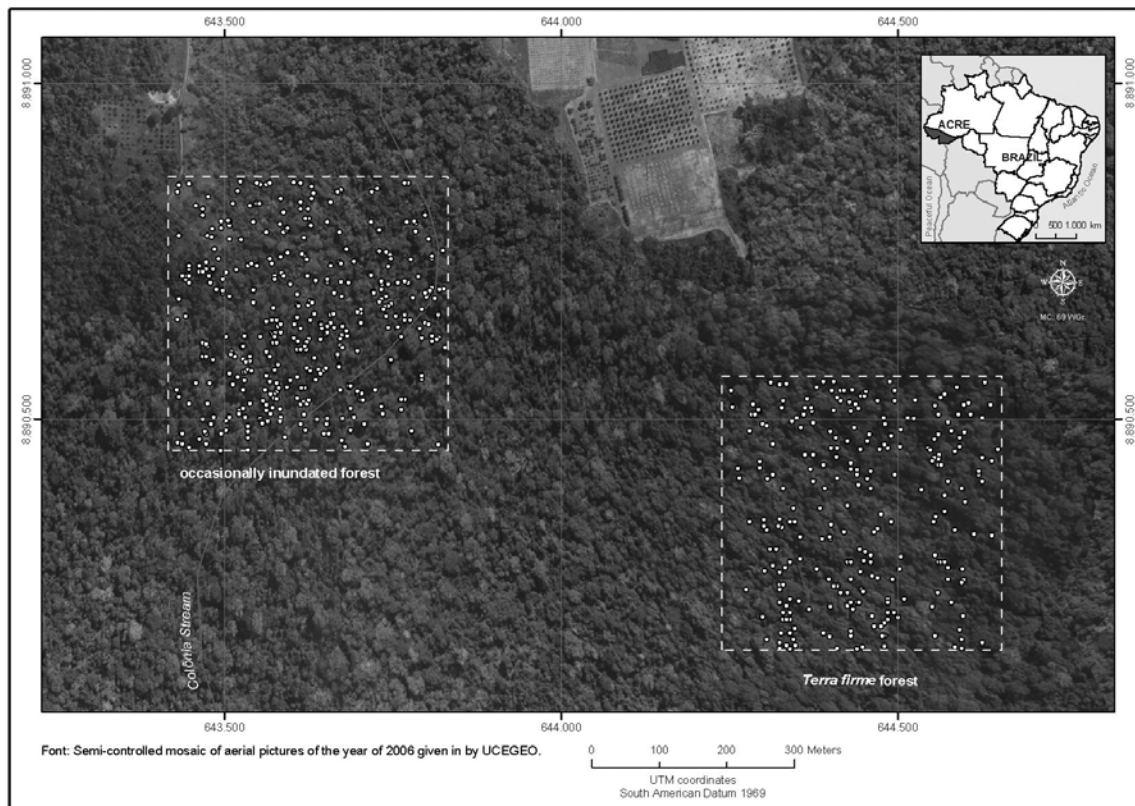

Supplement: gmb-35-818-s001.pdf [file gmb-35-818-s001.pdf]
